# Supplementary material for: Ultrathin nanoporous metallic films and their integration in sensors
Source: Royal Society of Chemistry journal article supplement (doi:10.1039/d4ma00134f), 2024-01-01
Supplement: d4ma00134f1.pdf [file d4ma00134f1.pdf]

Supplementary Information

### Ultrathin nanoporous metallic films and their integration in sensors

Hyunah Kwon,<sup>\*,a,b</sup> Mariana Alarcón-Correa,<sup>a,b</sup> Izar Schärf,<sup>a</sup> and Peer Fischer<sup>a,b,c,d</sup>

<sup>a</sup> Institute for Molecular Systems Engineering and Advanced Materials, Heidelberg University, INF 225, 69120 Heidelberg, Germany

<sup>b</sup> Max Planck Institute for Medical Research, Jahnstrasse 29, 69120 Heidelberg, Germany

<sup>c</sup> Center for Nanomedicine, Institute for Basic Science (IBS), Seoul 03722, Republic of Korea

<sup>d</sup> Department of Nano Biomedical Engineering (NanoBME), Advanced Science Institute, Yonsei University, Seoul, 03722, Republic of Korea

**Supplementary Table 1.** Various NPMFs fabrication conditions

| Metal/Metal alloy | PMMA (wt.%) | Plasma condition (power/ambient/time)         |
|-------------------|-------------|-----------------------------------------------|
| Au                | 1.5         | 200W/air/5min                                 |
| Au                | 5           | 200W/air/5min                                 |
| Pt                | 5           | 350W/W10 (Ar 90 %, H <sub>2</sub> 10 %)/15min |
| Mg                | 1.5         | 150W/W10 (Ar 90 %, H <sub>2</sub> 10 %)/15min |
| Al                | 2.5         | 300W/W10 (Ar 90 %, H <sub>2</sub> 10 %)/10min |
| NiFe              | 5           | 300W/W10 (Ar 90 %, H <sub>2</sub> 10 %)/15min |
| AuAg              | 5           | 200W/Ar/10min                                 |
| AuPt              | 5           | 200W/air/10min                                |
| PtPd              | 5           | 300W/W10 (Ar 90 %, H <sub>2</sub> 10 %)/15min |

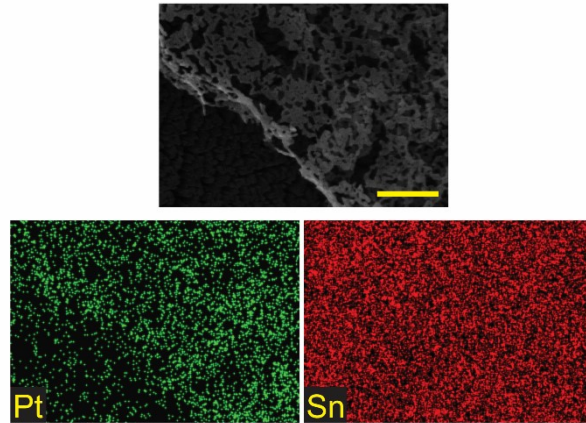

**Supplementary Figure 1.** SEM-EDX mapping of Pt NPMF coated SnO<sub>2</sub> nanostructures. The focus is placed on regions where the SnO<sub>2</sub> nanostructures are exposed. SnO<sub>2</sub> is uniformly deposited on IDE. The Pt NPMF exhibits a uniform coverage across the SnO<sub>2</sub> layer, which demonstrates the effective transfer.

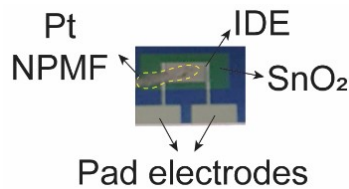

**Supplementary Figure 2.** Optical image of the sensor device. SnO<sub>2</sub> nanostructures are grown on the IDE, and Pt NPMF was transferred onto the active region as shown with the yellow dashed line.

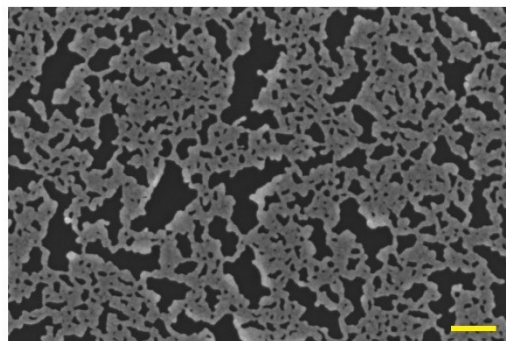

**Supplementary Figure 3.** SEM images of Pt NPMF after annealing at 500 °C for 2 hours in air. There is no significant morphological change. Scale bar: 200 nm.

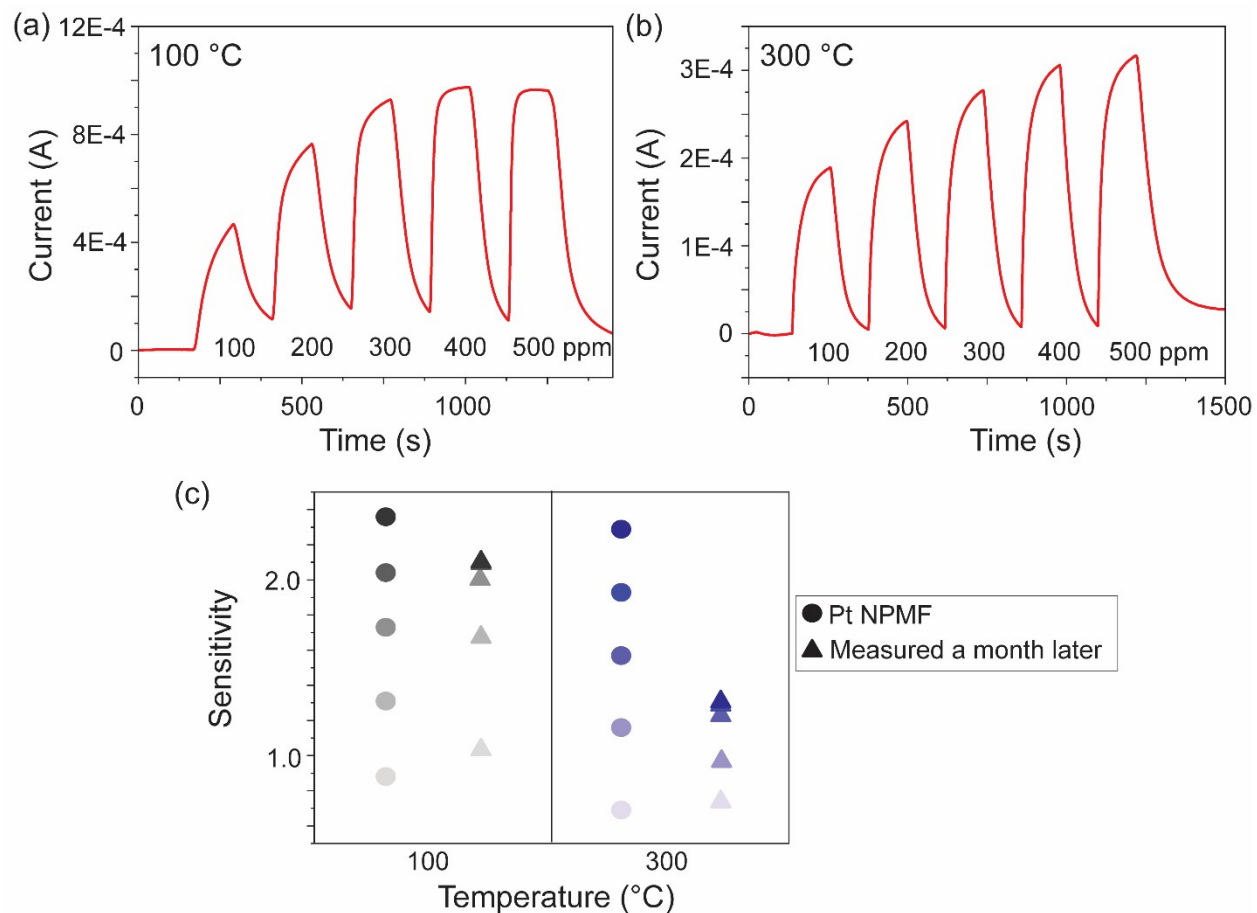

**Supplementary Figure 4.** Concentration-dependent H<sub>2</sub> sensing measurement results with the Pt NPMF transferred onto the sensor, measured a month after fabrication and using the same device, at a voltage of 0.1 V. Sensor operating temperatures are, respectively, (a) 100 °C and (b) 300 °C. H<sub>2</sub> at a concentration of 100, 200, 300, 400, and 500 ppm were exposed consecutively. H<sub>2</sub> exposure and dry air purging were repeated for 2 minutes each. Baseline of the current was subtracted from the original data to visualize the difference in current during H<sub>2</sub> exposure. (c) Sensitivity comparison. The observed saturation of sensitivity values at high concentrations are attributed to the storage of the sensor device in a humid air environment for a month, which may have led to the degradation of the SnO<sub>2</sub> nanostructures.

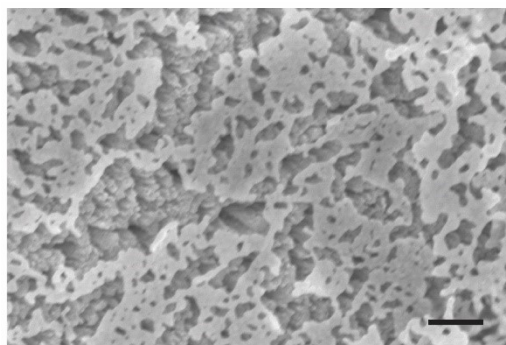

**Supplementary Figure 5.** SEM image of Pt NPMF on SnO<sub>2</sub> nanostructures after repeated gas sensing measurements and storage in humid air for a month. Scale bar: 200 nm.

**Supplementary Table 2.** Comparison of various techniques to fabricate NPMFs.

| Method Name      | Materials                          | Sacrificial metals | Ultrathin | Transfer | Purity                | Ref       |
|------------------|------------------------------------|--------------------|-----------|----------|-----------------------|-----------|
| Dry synthesis    | Au, Pt, Mg, Al, metal alloys, etc. | X                  | 2D-like   | O        | Ultrapure             | This work |
| Dealloying       | Au, Pt, Pd, Cu, Ag, etc.           | O                  | Bulky     | X        | Second metal remained | [1]       |
| Vapor dealloying | AuCu                               | O                  | 2D-like   | O        | Second metal remained | [2]       |
| Gelation         | Au                                 | X                  | 2D-like   | O        | -                     | [3]       |
| Electrochemical  | Cu                                 | O                  | Bulky     | X        | Second metal remained | [4]       |
| AAO-assisted     | Pt                                 | X                  | Bulky     | X        | -                     | [5]       |
| Self-assembly    | Au                                 | X                  | 2D-like   | O        | -                     | [6]       |

[1] G. Scandura, P. Kumari, G. Palmisano, G. N. Karanikolos, J. Orwa, L. F. Dumée, *Ind. Eng. Chem. Res.* 2023, **62**, 1736-1763.

[2] A. Chauvin, W. T. Cha Heu, J. Buh, P. -Y. Tessier, A. -A. El Mel, *npj Flex. Electron.* 2019, **3**,

- [3] K. Hiekel, S. Jungblut, M. Georgi, A. Eychmüller, *Angew. Chem. Int. Ed.* 2020, **59**, 12048-12054.
- [4] E. Castillo, J. Zhang, N. Dimitrov, *MRS Bull.* 2022, **47**, 913-925.
- [5] M. Sener, O. Sisman, N. Kilinc, *Catalysts* 2023, **13**, 459.
- [6] H. Xia, Y. Ran, H. Li, X. Tao, D. Wang, *J. Mater. Chem. A* 2013, **1**, 4678.
